# Supplementary material for: A Comprehensive Cohort Description and Statistical Grouping of Community-Based Residential Rehabilitation Service Users in Australia
Source: PubMed Central journal article supplement (PMC6857698; doi:10.3389/fpsyt.2019.00798), 2019-11-08

## Demographics of the CCU admission cohort

| Staffing model                         | Clinical         | Integrated       |                  | Total      | Test <sup>e</sup>                    | p    |
|----------------------------------------|------------------|------------------|------------------|------------|--------------------------------------|------|
| Site                                   | Site 1<br>(n=53) | Site 2<br>(n=52) | Site 3<br>(n=40) | N=145      |                                      |      |
| <b>Demographics</b>                    |                  |                  |                  |            |                                      |      |
| Accommodation:                         |                  |                  |                  |            | Fisher's Exact Test <sup>f</sup>     | .066 |
| - Living with family                   | 56.6%            | 50.0%            | 72.5%            | 58.6%      | -                                    | -    |
| - Supported housing                    | 18.9%            | 5.8%             | 10.0%            | 11.7%      | -                                    | -    |
| - Private rental                       | 9.4%             | 15.4%            | 10.0%            | 11.7%      | -                                    | -    |
| - No fixed address                     | 7.5%             | 21.2%            | 2.5%             | 11.0%      | -                                    | -    |
| - Other <sup>a</sup>                   | 7.5%             | 7.7%             | 5.0%             | 6.9%       | -                                    | -    |
| Age at admission ( $\bar{X}$ , years)  | 31.1 (8.7)       | 32.1 (8.7)       | 31.0 (9.8)       | 31.4 (9.0) | F <sub>(2)</sub> =.214               | .808 |
| Male sex                               | 66.0%            | 78.8%            | 77.5%            | 73.8%      | X <sup>2</sup> <sub>(2)</sub> =2.619 | .270 |
| Unemployment <sup>b</sup>              | 90.6%            | 82.7%            | 95.0%            | 89.0%      | X <sup>2</sup> <sub>(2)</sub> =3.707 | .157 |
| ATSI identification                    | 6.0%             | 3.8%             | 10%              | 6.2%       | Fisher's Exact Test <sup>f</sup>     | .525 |
| Australian born                        | 86.8%            | 90.4%            | 77.5%            | 85.5%      | X <sup>2</sup> <sub>(2)</sub> =3.140 | .208 |
| Highest education level <sup>c</sup> : |                  |                  |                  |            | H <sub>(2)</sub> =1.898              | .387 |
| - Primary school                       | 5.7%             | 3.8%             | 7.5%             | 5.5%       | -                                    | -    |
| - Year 10                              | 41.5%            | 55.8%            | 50.0%            | 49.0%      | -                                    | -    |
| - Year 12                              | 34.0%            | 19.2%            | 35.0%            | 29.0%      | -                                    | -    |
| - Tertiary <sup>d</sup>                | 18.9%            | 19.2%            | 7.5%             | 15.9%      | -                                    | -    |

<sup>a</sup> Public housing accounts for 70% of the 'Other' category

<sup>b</sup> Unemployment is exclusive of any form of paid or unpaid vocational activity including volunteering

<sup>c</sup> Treated as a scaled variable based on increasing levels of education, Kruskal-Wallis test applied

<sup>d</sup> Inclusive of any engagement in tertiary education including vocational training regardless of completion

<sup>e</sup> For categorical variables Chi Square test was applied unless the expected count for any cell was <5, in this case Fisher's Exact test was calculated

<sup>f</sup> Unadjusted odds ratio: Accommodation=14.200, ATSI identification=1.500

## Primary diagnosis and co-morbidity data for CCU Admission cohort

| Staffing model                    | Clinical         | Integrated       |                  | Total | Test <sup>b</sup>                | p           |
|-----------------------------------|------------------|------------------|------------------|-------|----------------------------------|-------------|
| Site                              | Site 1<br>(n=53) | Site 2<br>(n=52) | Site 3<br>(n=40) | N=145 |                                  |             |
| <b>Primary diagnosis</b>          |                  |                  |                  |       | -                                | -           |
| F20-29.x Schizophrenia spectrum   | 71.7%            | 73.1%            | 90.0%            | 77.2% | $X^2_{(2)}=5.143$                | .076        |
| Specific disorders <sup>a</sup> : |                  |                  |                  |       | -                                | -           |
| - F20.x Schizophrenia             | 47.2%            | 65.4%            | 67.5%            | 59.3% | -                                | -           |
| - F25.x Schizoaffective disorder  | 18.9%            | 5.8%             | 17.5%            | 13.8% | -                                | -           |
| - F29.x Unspecified psychosis     | 5.7%             | 1.9%             | 5.0%             | 4.1%  | -                                | -           |
| - F31.x Bipolar disorder          | 15.1%            | 11.5%            | 2.5%             | 10.3% | -                                | -           |
| - F32-34.x Depressive disorders   | 5.7%             | 11.5%            | 5.0%             | 7.6%  | -                                | -           |
| - Other disorders                 | 7.4%             | 3.9%             | 2.5%             | 4.9%  | -                                | -           |
| <b>Secondary diagnoses/issues</b> |                  |                  |                  |       | -                                | -           |
| Current tobacco use               | 30.2%            | 73.1%            | 70.0%            | 56.6% | $X^2_{(2)}=23.715$               | <b>.000</b> |
| Substance use                     | 37.7%            | 53.8%            | 42.5%            | 44.8% | $X^2_{(2)}=2.875$                | .237        |
| Physical health issue             | 22.6%            | 17.3%            | 35.0%            | 24.1% | $X^2_{(2)}=3.967$                | .138        |
| Trauma history                    | 9.4%             | 11.5%            | 7.5%             | 9.7%  | Fisher's Exact Test <sup>c</sup> | .883        |
| Anxiety disorder                  | 11.3%            | 9.6%             | 2.5%             | 8.3%  | Fisher's Exact Test <sup>c</sup> | .290        |
| Developmental disorder            | 7.5%             | 9.6%             | 7.5%             | 8.3%  | Fisher's Exact Test <sup>c</sup> | .932        |
| Personality disorder              | 5.7%             | 9.6%             | 5.0%             | 6.9%  | Fisher's Exact Test <sup>c</sup> | .711        |
| Obsessive-Compulsive Disorder     | 1.9%             | 9.6%             | 2.5%             | 4.8%  | Fisher's Exact Test <sup>c</sup> | .152        |

<sup>a</sup> Test statistic calculated only for the presence/absence of F20-29.x diagnoses (see above) given the number of diagnostic categories

<sup>b</sup> For categorical variables Chi Square test was applied unless the expected count for any cell was <5, in this case Fisher's Exact test was calculated

<sup>c</sup> Unadjusted odds ratio: Trauma history=0.445, Anxiety disorder=0.256, Developmental disorder=0.266, Personality Disorder=0.890, Obsessive-Compulsive Disorder=3.321

## Supplementary Table: Treatment related information for the CCU admission cohort

| Staffing model                          | Clinical         | Integrated       |                  | Total<br>(N=145) | Test                             | p     |
|-----------------------------------------|------------------|------------------|------------------|------------------|----------------------------------|-------|
|                                         | Site 1<br>(n=53) | Site 2<br>(n=52) | Site 3<br>(n=40) |                  |                                  |       |
| <b>Referral and Legal status</b>        |                  |                  |                  |                  |                                  |       |
| Community-based referral                | 56.6%            | 63.5%            | 62.5%            | 60.7%            | $X^2_{(2)}=.593$                 | .743  |
| Involuntary treatment <sup>b</sup>      | 52.8%            | 51.9%            | 32.5%            | 46.9%            | $X^2_{(2)}=4.606$                | .102  |
| Guardianship order present              | 5.7%             | 3.8%             | 5.0%             | 4.8%             | Fisher's Exact Test <sup>c</sup> | 1.000 |
| <b>Medications prescribed</b>           |                  |                  |                  |                  |                                  |       |
| Anti-psychotic medication:              |                  |                  |                  |                  |                                  |       |
| - CPZ equivalent dose ( $\bar{x}$ , mg) | 436.2 (365.3)    | 436.4 (284.5)    | 361.3 (257.7)    | 415.6 (309.8)    | $K_{(2)}=2.073$                  | .355  |
| - Depot prescribed                      | 45.3%            | 50.0%            | 40.0%            | 45.5%            | $X^2_{(2)}=0.914$                | .633  |
| - Clozapine prescribed                  | 17.0%            | 25.0%            | 37.5%            | 25.5%            | $X^2_{(2)}=5.061$                | .080  |
| - Number of antipsychotics              | 1.36 (0.71)      | 1.42 (0.696)     | 1.15 (0.58)      | 1.32 (0.676)     | $K_{(2)}=4.528$                  | .104  |
| Mood stabiliser:                        |                  |                  |                  |                  |                                  |       |
| - Lithium                               | 20.8%            | 21.2%            | 10.0%            | 17.9%            | $X^2_{(2)}=2.364$                | .307  |
| - Sodium valproate                      | 9.4%             | 15.4%            | 12.5%            | 12.4%            | $X^2_{(2)}=.855$                 | .652  |
| - Other                                 | 7.5%             | 3.8%             | 0.0%             | 4.1%             | $X^2_{(2)}=3.291$                | .193  |
| Other medication:                       |                  |                  |                  |                  |                                  |       |
| - Antidepressant                        | 41.5%            | 44.2%            | 42.5%            | 42.8%            | $X^2_{(2)}=.081$                 | .960  |
| - Benzodiazepine(s)                     | 13.2%            | 17.3%            | 7.5%             | 13.1%            | $X^2_{(2)}=1.911$                | .385  |

<sup>a</sup> Community-based referral compared to combined acute (35.2%) and sub-acute (4.1%) inpatient referral source

<sup>b</sup> Involuntary treatment includes both Involuntary Treatment Orders (43.5%) and Forensic Orders (3.4%)

<sup>c</sup> Unadjusted odds ratio: Guardianship order present =.359

## Supplementary Table: Treatment related information for CCU admission cohort (F20-29.x only)

| Staffing model                          | Clinical         | Integrated       |                  | Total<br>(N=112) | Test                             | p                       |
|-----------------------------------------|------------------|------------------|------------------|------------------|----------------------------------|-------------------------|
|                                         | Site 1<br>(n=38) | Site 2<br>(n=38) | Site 3<br>(n=36) |                  |                                  |                         |
| <b>Referral and Legal status</b>        |                  |                  |                  |                  |                                  |                         |
| Community-based referral <sup>a</sup>   | 55.3%            | 65.8%            | 61.1%            | 60.7%            | $X^2_{(2)}=.886$                 | .642                    |
| Involuntary treatment <sup>b</sup>      | 57.9%            | 57.9%            | 33.3%            | 50.0%            | $X^2_{(2)}=5.895$                | .052                    |
| Guardianship order present              | 5.3%             | 5.3%             | 5.6%             | 5.4%             | Fisher's Exact Test <sup>c</sup> | 1.000                   |
| <b>Medications prescribed</b>           |                  |                  |                  |                  |                                  |                         |
| Anti-psychotic medication:              |                  |                  |                  |                  |                                  |                         |
| - CPZ equivalent dose ( $\bar{x}$ , mg) | 511.94           | 511.84           | 397.73           | 475.20           | $K_{(2)}=5.445$                  | .355                    |
| - Depot prescribed                      | 52.6%            | 57.9%            | 44.4%            | 51.8%            | $X^2_{(2)}=1.356$                | .508                    |
| - Clozapine prescribed                  | 23.7%            | 34.2%            | 41.7%            | 33.0%            | $X^2_{(2)}=2.738$                | .254                    |
| - Number of antipsychotics <sup>d</sup> | 1.53(.647)       | 1.63(.541)       | 1.25(.500)       | 1.47(.584)       | $K_{(2)}=8.552$                  | <b>.014<sup>e</sup></b> |
| Mood stabiliser:                        |                  |                  |                  |                  |                                  |                         |
| - Lithium                               | 7.9%             | 18.4%            | 8.3%             | 11.6%            | Fisher's Exact Test <sup>c</sup> | .375                    |
| - Sodium valproate                      | 7.9%             | 15.8%            | 11.1%            | 11.6%            | Fisher's Exact Test <sup>c</sup> | .579                    |
| - Other                                 | 5.3%             | -                | -                | 1.8%             | Fisher's Exact Test <sup>c</sup> | .328                    |
| Other medication:                       |                  |                  |                  |                  |                                  |                         |
| - Antidepressant                        | 34.2%            | 39.5%            | 38.9%            | 37.5%            | $X^2_{(2)}=.268$                 | .874                    |
| - Benzodiazepine(s)                     | 10.5%            | 18.4%            | 5.6%             | 11.6%            | Fisher's Exact Test <sup>c</sup> | .229                    |

<sup>a</sup> Community-based referral compared to combined acute (34.8%) and sub-acute (4.5%) inpatient referral source

<sup>b</sup> Combined Involuntary Treatment Orders (45.5%) and Forensic Orders (4.5%), compared to voluntary status

<sup>c</sup> Unadjusted odds ratio: Guardianship order present = .226, Lithium prescribed = 2.338, Sodium valproate prescribed = 1.157, Other mood stabiliser prescribed = 2.630, Benzodiazepines prescribed = 2.855.

<sup>d</sup> Mean score, standard deviations is provided in brackets

<sup>e</sup> Post-hoc tests with Bonferroni correction for multiple tests identified statistically significant pairwise comparison between Sites 2 and 3 only ( $p=.013$ )

## Supplementary Table: Clinical assessment battery for the CCU admission cohort, mean scores and standard deviation

| Staffing model                    | Clinical |                | Integrated |                |        | Total          |     | N <sup>a</sup> | Test                | p                       |
|-----------------------------------|----------|----------------|------------|----------------|--------|----------------|-----|----------------|---------------------|-------------------------|
|                                   | Site 1   |                | Site 2     |                | Site 3 |                |     |                |                     |                         |
|                                   | n        | $\bar{x}$ (SD) | n          | $\bar{x}$ (SD) | n      | $\bar{x}$ (SD) |     |                |                     |                         |
| <b>Functioning and disability</b> |          |                |            |                |        |                |     |                |                     |                         |
| HoNOS (Total)                     | 53       | 8.98(6.125)    | 51         | 9.75(4.707)    | 40     | 12.80(6.638)   | 144 | 10.31(5.992)   | $K_{(2)}=9.444$     | <b>.009<sup>b</sup></b> |
| - Behaviour                       |          | 1.13(1.699)    |            | 1.06(1.475)    |        | 1.20(1.682)    |     | 1.13(1.608)    | $K_{(2)}=.169$      | .919                    |
| - Impairment                      |          | 1.38(1.431)    |            | 1.49(1.317)    |        | 2.48(1.633)    |     | 1.72(1.517)    | $K_{(2)}=13.293$    | <b>.001<sup>c</sup></b> |
| - Symptoms                        |          | 2.74(2.159)    |            | 3.65(2.331)    |        | 4.55(2.501)    |     | 3.56(2.414)    | $K_{(2)}=12.303$    | <b>.002<sup>d</sup></b> |
| - Social                          |          | 3.74(2.995)    |            | 3.55(2.766)    |        | 4.58(3.161)    |     | 3.90(2.974)    | $K_{(2)}=2.740$     | .254                    |
| LSP-16 (Total)                    | 50       | 10.78(5.643)   | 51         | 12.53(6.166)   | 39     | 13.62(5.775)   | 140 | 12.21(5.945)   | $K_{(2)}=5.262$     | .072                    |
| - Withdrawal                      |          | 2.58(1.864)    |            | 2.92(1.864)    |        | 3.26(1.860)    |     | 2.89(1.869)    | $K_{(2)}=4.042$     | .132                    |
| - Self-care                       |          | 3.38(2.118)    |            | 4.53(2.411)    |        | 5.38(2.208)    |     | 4.36(2.378)    | $K_{(2)}=16.799$    | <b>.000<sup>b</sup></b> |
| - Compliance                      |          | 2.14(1.539)    |            | 2.10(1.652)    |        | 1.77(1.512)    |     | 2.02(1.571)    | $K_{(2)}=1.036$     | .596                    |
| - Anti-social                     |          | 1.48(1.515)    |            | 1.43(1.723)    |        | 1.46(1.620)    |     | 1.46(1.611)    | $K_{(2)}=.212$      | .899                    |
| Allen Cognitive Level             | 51       | 5.03 (.405)    | 48         | 5.16(.4261)    | 40     | 5.01(337)      | 139 | 5.07(.398)     | $K_{(2)}=5.345$     | .069                    |
| Social Functioning Scale          | 51       | 107.05(7.814)  | 50         | 102.95(7.996)  | 39     | 100.84(7.784)  | 140 | 103.85(8.224)  | $K_{(2)}=13.362$    | <b>.001<sup>f</sup></b> |
| <b>Symptomatic measures*</b>      |          |                |            |                |        |                |     |                |                     |                         |
| BPRS-18 (Total)                   | 51       | 37.47(8.889)   | 46         | 36.67(9.778)   | 36     | 42.81(9.730)   | 133 | 38.64(9.707)   | $K_{(2)}=8.162$     | <b>.017<sup>g</sup></b> |
| - Resistance                      |          | 6.08(2.606)    |            | 5.89(1.816)    |        | 5.92(2.285)    |     | 5.97(2.256)    | $K_{(2)}=.290$      | .865                    |
| - Positive symptoms               |          | 10.51(5.108)   |            | 10.33(4.634)   |        | 12.25(5.369)   |     | 10.92(5.054)   | $K_{(2)}=3.337$     | .189                    |
| - Negative symptoms               |          | 6.76(3.664)    |            | 6.02(3.363)    |        | 7.69(3.060)    |     | 6.76(3.442)    | $K_{(2)}=6.790$     | <b>.034<sup>h</sup></b> |
| - Psychological discomfort        |          | 13.00(4.152)   |            | 13.09(5.001)   |        | 15.50(5.364)   |     | 13.71(4.888)   | $F_{(2,130)}=3.449$ | <b>.035<sup>i</sup></b> |
| SANS (Total)                      | 51       | 43.53(18.884)  | 49         | 49.53(16.686)  | 36     | 50.61(18.243)  | 136 | 47.57(18.094)  | $F_{(2,133)}=2.102$ | .126                    |
| - Affective flattening            |          | 14.65(8.756)   |            | 14.90(8.295)   |        | 14.94(8.349)   |     | 14.77(8.442)   | $K_{(2)}=.122$      | .941                    |
| - Alogia                          |          | 3.29(4.125)    |            | 4.86(4.168)    |        | 5.58(4.129)    |     | 4.53(4.267)    | $K_{(2)}=10.231$    | <b>.006<sup>j</sup></b> |
| - Avolition/apathy                |          | 8.71(4.494)    |            | 10.27(2.782)   |        | 10.64(3.331)   |     | 9.78(3.699)    | $K_{(2)}=8.643$     | <b>.013<sup>k</sup></b> |

|                        |              |              |              |              |                     |      |
|------------------------|--------------|--------------|--------------|--------------|---------------------|------|
| - Anhedonia/asociality | 13.41(5.193) | 15.08(3.834) | 14.69(4.125) | 14.29(4.553) | $F_{(2,133)}=1.892$ | .155 |
| - Attention            | 3.47(3.349)  | 4.43(3.482)  | 4.75(2.802)  | 4.17(.374)   | $K_{(2)}=4,564$     | .102 |

**Substance use (alcohol)**

|       |    |             |    |               |    |             |     |             |                  |                         |
|-------|----|-------------|----|---------------|----|-------------|-----|-------------|------------------|-------------------------|
| AUDIT | 48 | 4.90(7.856) | 50 | 10.38(10.111) | 35 | 6.80(6.957) | 133 | 7.46(8.839) | $K_{(2)}=12.809$ | <b>.002<sup>l</sup></b> |
|-------|----|-------------|----|---------------|----|-------------|-----|-------------|------------------|-------------------------|

- a Available sample size varies based on missing data: HoNOS (.9%), LSP-16 (3.5%), Allens Cognitive Level (4.1%), SFS (3.4%), BPRS-18 (8.3%), SANS (6.2%) and AUDIT (8.3%)
- b Post-hoc tests with Bonferroni correction for multiple tests identified statistically significant pairwise comparison between Sites 1 and 3 only ( $p=.006$ )
- c Post-hoc tests with Bonferroni correction for multiple tests identified statistically significant pairwise comparison between Site 3 and Sites 1&2 ( $p=.002$ ,  $p=.011$  respectively)
- d Post-hoc tests with Bonferroni correction for multiple tests identified statistically significant pairwise comparison between Sites 1 and 3 only ( $p=.002$ )
- e Post-hoc tests with Bonferroni correction for multiple tests identified statistically significant pairwise comparison between Site 1 and Sites 2&3 ( $p=.033$ ,  $p=.017$  respectively)
- f Post-hoc tests with Bonferroni correction for multiple tests identified statistically significant pairwise comparison between Site 1 and Sites 2&3 ( $p=.034$ ,  $p=.001$  respectively)
- g Post-hoc tests with Bonferroni correction for multiple tests identified statistically significant pairwise comparison between Sites 2 and 3 only ( $p=.023$ )
- h Post-hoc tests with Bonferroni correction for multiple tests identified statistically significant pairwise comparison between Sites 2 and 3 only ( $p=.029$ )
- i Post-hoc tests with Bonferroni correction for multiple tests identified no statistically significant pairwise comparisons
- j Post-hoc tests with Bonferroni correction for multiple tests identified statistically significant pairwise comparison between Sites 1 and 2&3 ( $p=.043$ ,  $p=.010$  respectively)
- k Post-hoc tests with Bonferroni correction for multiple tests identified statistically significant pairwise comparison between Sites 1 and 3 only ( $p=.022$ )
- l Post-hoc tests with Bonferroni correction for multiple tests identified statistically significant pairwise comparison between Sites 1 and 2 only ( $p=.001$ )

## Supplementary Table: Clinical assessment battery for the CCU admission cohort (F20-29.x only)

| Staffing model                    | Clinical |                | Integrated |                |        | Total          |     | N <sup>a</sup> | Test                        | p                       |
|-----------------------------------|----------|----------------|------------|----------------|--------|----------------|-----|----------------|-----------------------------|-------------------------|
|                                   | Site 1   |                | Site 2     |                | Site 3 |                |     |                |                             |                         |
|                                   | n        | $\bar{x}$ (SD) | n          | $\bar{x}$ (SD) | n      | $\bar{x}$ (SD) |     |                |                             |                         |
| <b>Functioning and disability</b> |          |                |            |                |        |                |     |                |                             |                         |
| HoNOS (Total)                     | 38       | 7.53(4.864)    | 37         | 9.27(4.593)    | 36     | 11.97(6.194)   | 111 | 9.55(5.516)    | K <sub>(2)</sub> =10.912    | <b>.004<sup>b</sup></b> |
| - Behaviour                       |          | .66(1.097)     |            | .86(1.084)     |        | 1.03(1.424)    |     | .85(1.208)     | K <sub>(2)</sub> =1.768     | .413                    |
| - Impairment                      |          | 1.18(1.333)    |            | 1.41(1.189)    |        | 2.42(1.713)    |     | 1.66(1.511)    | K <sub>(2)</sub> =11.401    | <b>.003<sup>c</sup></b> |
| - Symptoms                        |          | 2.66(2.233)    |            | 3.57(2.534)    |        | 4.44(2.568)    |     | 3.54(2.533)    | K <sub>(2)</sub> =9.376     | <b>.009<sup>d</sup></b> |
| - Social                          |          | 3.03(2.433)    |            | 3.43(2.774)    |        | 4.08(2.812)    |     | 3.50(2.686)    | K <sub>(2)</sub> =2.798     | .247                    |
| LSP-16 (Total)                    | 38       | 22.97(16.714)  | 38         | 18.08(12.052)  | 36     | 16.43(6.464)   | 108 | 19.18(12.698)  | K <sub>(2)</sub> =2.508     | .285                    |
| - Withdrawal                      |          | 6.61(4.435)    |            | 5.89(3.821)    |        | 5.37(2.669)    |     | 5.96(3.724)    | K <sub>(2)</sub> =.883      | .643                    |
| - Self-care                       |          | 6.78(5.772)    |            | 5.76(3.655)    |        | 6.57(3.319)    |     | 6.36(4.370)    | K <sub>(2)</sub> =1.829     | .401                    |
| - Compliance                      |          | 3.89(4.328)    |            | 2.78(2.200)    |        | 2.26(2.331)    |     | 2.98(3.153)    | K <sub>(2)</sub> =3.831     | .147                    |
| - Anti-social                     |          | 5.69(6.769)    |            | 3.65(6.061)    |        | 2.23(3.163)    |     | 3.87(5.705)    | K <sub>(2)</sub> =6.326     | <b>.042<sup>e</sup></b> |
| Allen Cognitive Level             | 37       | 5.03(.409)     | 36         | 5.100(.4071)   | 36     | 4.99(.351)     | 109 | 5.039(.389)    | F <sub>(2,106)</sub> =.755  | .473                    |
| Social functioning scale          | 37       | 106.47(8.248)  | 36         | 103.38(8.320)  | 35     | 101.54(7.641)  | 108 | 103.84(8.263)  | F <sub>(2,105)</sub> =3.432 | <b>.036<sup>f</sup></b> |
| <b>Symptomatic measures*</b>      |          |                |            |                |        |                |     |                |                             |                         |
| BPRS-18 (Total)                   | 36       | 39.31(9.099)   | 34         | 38.47(9.589)   | 33     | 43.09(10.110)  | 103 | 40.24(9.706)   | K <sub>(2)</sub> =3.175     | .204                    |
| - Resistance                      |          | 6.33(2.878)    |            | 6.00(1.792)    |        | 5.67(2.010)    |     | 6.01(2.286)    | K <sub>(2)</sub> =1.234     | .540                    |
| - Positive symptoms               |          | 11.94(5.231)   |            | 11.26(4.654)   |        | 12.79(3.442)   |     | 11.99(5.054)   | K <sub>(2)</sub> =1.266     | .531                    |
| - Negative symptoms               |          | 6.92(3.442)    |            | 6.74(3.587)    |        | 7.79(3.180)    |     | 7.14(3.407)    | K <sub>(2)</sub> =2.502     | .286                    |
| - Psychological discomfort        |          | 13.06(4.362)   |            | 13.00(4.905)   |        | 15.36(5.550)   |     | 13.78(5.017)   | F <sub>(2,100)</sub> =2.501 | .087                    |
| SANS (Total)                      | 36       | 43.89(14.790)  | 35         | 54.91(15.334)  | 33     | 51.09(18.603)  | 104 | 52.62(16.305)  | F <sub>(2,104)</sub> =1.243 | .293                    |
| - Affective flattening            |          | 17.22(7.620)   |            | 16.74(8.154)   |        | 15.30(8.509)   |     | 16.45(8.052)   | K <sub>(2)</sub> =.990      | .610                    |
| - Alogia                          |          | 3.36(3.773)    |            | 6.11(4.185)    |        | 5.70(4.104)    |     | 5.03(4.168)    | K <sub>(2)</sub> =10.708    | <b>.005<sup>g</sup></b> |
| - Avolition/apathy                |          | 9.75(3.894)    |            | 10.63(2.568)   |        | 10.55(3.465)   |     | 10.30(3.350)   | F <sub>(2,104)</sub> =1.226 | .298                    |

|                        |              |              |              |              |                         |      |
|------------------------|--------------|--------------|--------------|--------------|-------------------------|------|
| - Anhedonia/asociality | 15.08(4.423) | 16.00(3.804) | 14.61(4.153) | 15.24(4.137) | K <sub>(2)</sub> =1.961 | .375 |
| - Attention            | 3.47(3.229)  | 5.43(3.517)  | 4.94(2.828)  | 4.60(3.290)  | K <sub>(2)</sub> =5.585 | .061 |

**Substance use**

|       |    |             |    |             |    |             |     |             |                         |                         |
|-------|----|-------------|----|-------------|----|-------------|-----|-------------|-------------------------|-------------------------|
| AUDIT | 36 | 5.78(8.839) | 37 | 9.89(9.776) | 32 | 6.69(6.860) | 105 | 7.60(8.752) | K <sub>(2)</sub> =6.700 | <b>.029<sup>h</sup></b> |
|-------|----|-------------|----|-------------|----|-------------|-----|-------------|-------------------------|-------------------------|

- <sup>a</sup> Available sample size varies based on missing data: HoNOS (.9%), LSP-16 (3.6%), Allens Cognitive Level (2.7%), BPRS-18 (8.0%), SANS (7.1%) and AUDIT (6.7%)
- <sup>b</sup> Post-hoc tests with Bonferroni correction for multiple tests identified statistically significant pairwise comparison between Sites 1 and 3 only (p=.003)
- <sup>c</sup> Post-hoc tests with Bonferroni correction for multiple tests identified statistically significant pairwise comparison between Sites 1 and 3 only (p=.003)
- <sup>d</sup> Post-hoc tests with Bonferroni correction for multiple tests identified statistically significant pairwise comparison between Sites 1 and 3 only (p=.007)
- <sup>e</sup> Post-hoc tests with Bonferroni correction for multiple tests identified statistically significant pairwise comparison between Sites 1 and 3 only (p=.047)
- <sup>f</sup> Post-hoc tests with Bonferroni correction for multiple tests identified statistically significant pairwise comparison between Sites 3 and 1&2 (p=.033, p=.028 respectively)
- <sup>g</sup> Post-hoc tests with Bonferroni correction for multiple tests identified statistically significant pairwise comparison between Sites 1 and 2&3 (p=.008, p=.029 respectively)
- <sup>h</sup> Post-hoc tests with Bonferroni correction for multiple tests identified statistically significant pairwise comparison between Sites 1 and 3 only (p=.029)



## Supplementary Table Consumer rated assessments for the CCU admission cohort

| Staffing model                         | Clinical |               | Integrated |                |    | Total         |     | Test          | p                           |      |
|----------------------------------------|----------|---------------|------------|----------------|----|---------------|-----|---------------|-----------------------------|------|
|                                        | Site 1   | Site 2        | Site 3     | N <sup>a</sup> |    |               |     |               |                             |      |
|                                        | n        | $\bar{x}(SD)$ | n          | $\bar{x}(SD)$  | n  | $\bar{x}(SD)$ |     |               |                             |      |
| <b>Mental Health Inventory (Total)</b> | 52       | 57.52(17.076) | 52         | 53.17(21.787)  | 40 | 56.40(21.358) | 144 | 55.64(20.034) | K <sub>(2)</sub> =1.899     | .387 |
| Psychological wellbeing                |          | 47.50(21.775) |            | 41.92(25.469)  |    | 47.08(19.737) |     | 45.37(22.660) | K <sub>(2)</sub> =1.488     | .475 |
| Psychological distress                 |          | 34.04(21.718) |            | 38.90(24.579)  |    | 32.60(24.674) |     | 35.40(23.602) | K <sub>(2)</sub> =1.385     | .500 |
| <b>STORI-30</b>                        | 45       | -             | 47         | -              | 40 | -             | 132 | -             | Fisher's exact <sup>b</sup> | .318 |
| Moratorium                             | 7        | 15.6%         | 5          | 10.6%          | 2  | 5.0%          | 14  | 10.6%         |                             |      |
| Awareness                              | 17       | 37.8%         | 10         | 21.3%          | 18 | 45.0%         | 45  | 34.1%         |                             |      |
| Preparation                            | 3        | 6.7%          | 3          | 6.4%           | 3  | 7.5%          | 9   | 6.8%          |                             |      |
| Rebuilding                             | 7        | 15.6%         | 13         | 27.7%          | 6  | 15.0%         | 26  | 19.7%         |                             |      |
| Growth                                 | 11       | 24.4%         | 16         | 34.0%          | 11 | 27.5%         | 38  | 28.8%         |                             |      |

<sup>a</sup> Available sample size varies based on missing data: MHI (.6%), STORI-30 (9.0%)

<sup>b</sup> Unadjusted odds ratio: STORI-30 = 9.228

### Consumer rated assessments for the CCU admission cohort (F20-29.x only)

| Staffing model                         | Clinical |               | Integrated |               |        | N <sup>a</sup> | Total | Test          | p                           |      |
|----------------------------------------|----------|---------------|------------|---------------|--------|----------------|-------|---------------|-----------------------------|------|
|                                        | Site 1   | Site 2        | Site 2     | Site 3        | Site 3 |                |       |               |                             |      |
|                                        | n        | $\bar{x}(SD)$ | n          | $\bar{x}(SD)$ | n      | $\bar{x}(SD)$  |       |               |                             |      |
| <b>Mental Health Inventory (Total)</b> | 37       | 56.95(18.571) | 38         | 55.61(21.104) | 36     | 57.44(21.771)  | 111   | 56.65(20.350) | K <sub>(2)</sub> =.737      | .692 |
| Psychological wellbeing                |          | 47.42(23.197) |            | 45.29(24.851) |        | 48.61(18.958)  |       | 47.08(22.363) | F <sub>(2,108)</sub> =.208  | .813 |
| Psychological distress                 |          | 35.97(22.060) |            | 36.50(24.837) |        | 31.03(24.997)  |       | 34.55(23.91)  | K <sub>(2)</sub> =1.713     | .425 |
| <b>STORI-30</b>                        | 32       |               | 34         |               | 36     |                | 102   |               | Fisher's Exact <sup>b</sup> | .573 |
| Moratorium                             | 6        | 18.8%         | 3          | 8.8%          | 2      | 5.6%           | 11    | 10.8%         |                             |      |
| Awareness                              | 11       | 34.4%         | 8          | 23.5%         | 15     | 41.7%          | 34    | 33.3%         |                             |      |
| Preparation                            | 2        | 6.3%          | 2          | 5.9%          | 2      | 5.6%           | 6     | 5.9%          |                             |      |
| Rebuilding                             | 6        | 18.8%         | 10         | 29.4%         | 6      | 16.7%          | 22    | 21.6%         |                             |      |
| Growth                                 | 7        | 21.9%         | 11         | 32.4%         | 11     | 30.6%          | 29    | 28.4%         |                             |      |

<sup>a</sup> Available sample size varies based on missing data: MHI (.9%), STORI-30 (8.9%)

<sup>b</sup> Unadjusted odds ratio: STORI-30 = 6.741

**Supplementary Table: Consumer rated assessments for the CCU admission cohort (F20-29.x only)**

| Staffing model                         | Clinical |               | Integrated |               |        | Total          |               | Test          | p                           |      |
|----------------------------------------|----------|---------------|------------|---------------|--------|----------------|---------------|---------------|-----------------------------|------|
|                                        | Site 1   |               | Site 2     |               | Site 3 | N <sup>a</sup> | $\bar{x}(SD)$ |               |                             |      |
|                                        | n        | $\bar{x}(SD)$ | n          | $\bar{x}(SD)$ | n      |                |               | $\bar{x}(SD)$ |                             |      |
| <b>Mental Health Inventory (Total)</b> | 37       | 56.95(18.571) | 38         | 55.61(21.104) | 36     | 57.44(21.771)  | 111           | 56.65(20.350) | K <sub>(2)</sub> =.737      | .692 |
| Psychological wellbeing                |          | 47.42(23.197) |            | 45.29(24.851) |        | 48.61(18.958)  |               | 47.08(22.363) | F <sub>(2,108)</sub> =.208  | .813 |
| Psychological distress                 |          | 35.97(22.060) |            | 36.50(24.837) |        | 31.03(24.997)  |               | 34.55(23.91)  | K <sub>(2)</sub> =1.713     | .425 |
| <b>STORI-30</b>                        | 32       |               | 34         |               | 36     |                | 102           |               | Fisher's Exact <sup>b</sup> | .573 |
| Moratorium                             | 6        | 18.8%         | 3          | 8.8%          | 2      | 5.6%           | 11            | 10.8%         |                             |      |
| Awareness                              | 11       | 34.4%         | 8          | 23.5%         | 15     | 41.7%          | 34            | 33.3%         |                             |      |
| Preparation                            | 2        | 6.3%          | 2          | 5.9%          | 2      | 5.6%           | 6             | 5.9%          |                             |      |
| Rebuilding                             | 6        | 18.8%         | 10         | 29.4%         | 6      | 16.7%          | 22            | 21.6%         |                             |      |
| Growth                                 | 7        | 21.9%         | 11         | 32.4%         | 11     | 30.6%          | 29            | 28.4%         |                             |      |

<sup>a</sup> Available sample size varies based on missing data: MHI (.9%), STORI-30 (8.9%)

<sup>b</sup> Unadjusted odds ratio: STORI-30 = 6.741

**Supplementary Table: Comparisons between the cohort and the modified TRR cohort from Parker et al (2019)**

|                                    |        | TRR cohort<br>(n) | Admission<br>cohort (n) | Chi-square | p           |
|------------------------------------|--------|-------------------|-------------------------|------------|-------------|
| <b>Sex</b>                         | Male   | 733               | 107                     | .11        | .744        |
|                                    | Female | 278               | 38                      | -          | -           |
| <b>Australian born</b>             | Yes    | 559               | 124                     | .03        | .863        |
|                                    | No     | 99                | 21                      | -          | -           |
| <b>ATSI identification</b>         | Yes    | 90                | 9                       | 1.46       | .228        |
|                                    | No     | 882               | 136                     | -          | -           |
| <b>Unemployment</b>                | Yes    | 169               | 129                     | 18.3       | <b>.000</b> |
|                                    | No     | 72                | 16                      | -          | -           |
| <b>Community-based referral</b>    | Yes    | 375               | 88                      | 1.2        | .274        |
|                                    | No     | 298               | 57                      | -          | -           |
| <b>Involuntary treatment</b>       | Yes    | 534               | 68                      | .25        | .6134       |
|                                    | No     | 553               | 77                      | -          | -           |
| <b>Guardianship order</b>          | Yes    | 321               | 7                       | 71.6       | <b>.000</b> |
|                                    | No     | 452               | 138                     | -          | -           |
| <b>Diagnosis F20-29.x</b>          | Yes    | 970               | 112                     | 8.05       | <b>.005</b> |
|                                    | No     | 156               | 33                      | -          | -           |
| <b>Substance use issue</b>         | Yes    | 184               | 65                      | 40.5       | <b>.000</b> |
|                                    | No     | 712               | 80                      | -          | -           |
| <b>-Developmental disorders</b>    | Yes    | 13                | 12                      | 5.9        | <b>.015</b> |
|                                    | No     | 380               | 133                     | -          | -           |
| <b>Personality disorder</b>        | Yes    | 19                | 10                      | .88        | .347        |
|                                    | No     | 374               | 135                     | -          | -           |
| <b>Physical health issues</b>      | Yes    | 396               | 35                      | 8.5        | <b>.004</b> |
|                                    | No     | 691               | 110                     | -          | -           |
| <b>Age (mean)</b>                  | -      | 35.5              | 31.4                    | -          | -           |
| <b>LSP Total (mean)</b>            | -      | 17.5              | 19.1                    | -          | -           |
| <b>HoNOS Total (mean)</b>          | -      | 15.3              | 10.3                    | -          | -           |
| <b>CPZ Dose equivalence (mean)</b> | -      | 612.5             | 415.6                   | -          | -           |

## Supplementary table: Demographics by cluster

| Site                                        | Cluster 1<br>(n=17) | Cluster 2<br>(n=43) | Cluster 3<br>(n=51) | TOTAL<br>(N=111) |                     |      |
|---------------------------------------------|---------------------|---------------------|---------------------|------------------|---------------------|------|
| <b>Demographics</b>                         |                     |                     |                     |                  | -                   | -    |
| Age in years at admission ( $\bar{x}$ , SD) | 31.35(7.441)        | 32.98(10.809)       | 29.82(8.294)        | 31.28(9.276)     | $F_{(2,108)}=1.357$ | .262 |
| Male sex                                    | 76.5%               | 79.1%               | 70.6%               | 74.8%            | Fisher's Exact Test | .669 |
| Australian born                             | 88.2%               | 90.7%               | 86.3%               | 88.3%            | Fisher's Exact Test | .857 |
| ATSI identification                         | 17.6%               | 4.9%                | 6.3%                | 7.2%             | Fisher's Exact Test | .178 |
| Unemployment <sup>a</sup>                   | 82.4%               | 97.7%               | 90.2%               | 91.9%            | Fisher's Exact Test | .090 |
| <b>Accommodation (most recent)</b>          |                     |                     |                     |                  | Fisher's Exact Test | .133 |
| Living with family                          | 58.8%               | 55.8%               | 62.7%               | 59.5%            | -                   | -    |
| Supported housing                           | 5.9%                | 20.9%               | 5.9%                | 11.7%            | -                   | -    |
| Private rental                              | 23.5%               | 7.0%                | 9.8%                | 10.8%            | -                   | -    |
| No fixed address                            | 5.9%                | 7.0%                | 17.6%               | 11.7%            | -                   | -    |
| Other <sup>b</sup>                          | 5.9%                | 9.3%                | 3.9%                | 6.3%             | -                   | -    |
| <b>Highest education level<sup>c</sup></b>  |                     |                     |                     |                  | $H_{(2)}=3.538$     | .171 |
| Primary school                              | 5.9%                | 4.7%                | 7.8%                | 6.3%             | -                   | -    |
| Year 10                                     | 52.9%               | 55.8%               | 35.3%               | 45.9%            | -                   | -    |
| Year 12                                     | 35.3%               | 25.6%               | 35.3%               | 31.5%            | -                   | -    |
| Tertiary <sup>d</sup>                       | 5.9%                | 14.0%               | 21.6%               | 16.2%            | -                   | -    |

<sup>a</sup> Unemployment is exclusive of any form of paid or unpaid vocational activity including volunteering

<sup>b</sup> Public housing accounts for 70% of the 'Other' category

<sup>c</sup> Treated as a scaled variable based on increasing levels of education, Kruskal-Wallis test applied

<sup>d</sup> Inclusive of any engagement in tertiary education including vocational training regardless of completion

## Supplementary Table: Diagnosis by cluster

|                                      | Cluster 1<br>(n=17) | Cluster 2<br>(n=43) | Cluster 3<br>(n=51) | TOTAL<br>(N=111) | Test <sup>b</sup>                | p                       |
|--------------------------------------|---------------------|---------------------|---------------------|------------------|----------------------------------|-------------------------|
| <b>Primary diagnosis<sup>a</sup></b> |                     |                     |                     |                  | -                                | -                       |
| F20-29.x Schizophrenia spectrum      | 82.4%               | 88.4%               | 72.5%               | 80.2%            | Fisher's Exact Test <sup>c</sup> | .156                    |
| Specific disorders <sup>a</sup> :    |                     |                     |                     |                  | -                                | -                       |
| - F20.x Schizophrenia                | 64.7%               | 60.5%               | 64.7%               | 63.1%            | -                                | -                       |
| - F25.x Schizoaffective disorder     | 17.6%               | 20.9%               | 3.9%                | 12.6%            | -                                | -                       |
| - F29.x Unspecified psychosis        | -                   | 7.0%                | 3.9%                | 4.5%             | -                                | -                       |
| - F31.x Bipolar disorder             | 11.8%               | 2.3%                | 13.8%               | 9.0%             | -                                | -                       |
| - F32-34.x Depressive disorders      | 5.9%                | 7.0%                | 5.9%                | 6.3%             | -                                | -                       |
| - Other disorders                    | -                   | 2.3%                | 3.9%                | 2.7%             | -                                | -                       |
| <b>Secondary diagnoses/issues</b>    |                     |                     |                     |                  | -                                | -                       |
| Current tobacco use                  | 70.6%               | 65.1%               | 47.1%               | 57.7%            | $X^2_{(2)}=4.491$                | .106                    |
| Substance use                        | 94.1%               | 32.6%               | 35.3%               | 43.2%            | $X^2_{(2)}=21.240$               | <b>.000<sup>d</sup></b> |
| Physical health issue                | 11.8%               | 27.9%               | 17.6%               | 20.7%            | Fisher's Exact Test <sup>c</sup> | .353                    |
| Trauma history                       | 5.9%                | 2.3%                | 11.8%               | 7.2%             | Fisher's Exact Test <sup>c</sup> | .207                    |
| Anxiety disorder                     | 5.9%                | 4.7%                | 15.7%               | 9.9%             | Fisher's Exact Test <sup>c</sup> | .191                    |
| Developmental disorder               | 5.9%                | 4.7%                | 13.3%               | 8.1%             | Fisher's Exact Test <sup>c</sup> | .456                    |
| Personality disorder                 | 23.5%               | 4.7%                | 3.9%                | 7.2%             | Fisher's Exact Test <sup>c</sup> | <b>.042<sup>e</sup></b> |
| Obsessive-Compulsive Disorder        | -                   | 9.3%                | 3.9%                | 5.4%             | Fisher's Exact Test <sup>c</sup> | .447                    |

<sup>a</sup> Test statistic calculated only for the presence/absence of F20-29.x diagnoses (see above) given the number of diagnostic categories

<sup>b</sup> For categorical variables, the Chi Square test was applied unless the expected count for any cell was <5, in this case, Fisher's Exact test was calculated

<sup>c</sup> Unadjusted odds ratio: F20-29.x Schizophrenia spectrum=3.628, Substance use=22.60, Physical health issue=2.239; Trauma history=2.943; Trauma history=3.099; Developmental disorder=1.513; Personality disorder=6.082; Obsessive-Compulsive Disorder=1.787

<sup>d</sup> Cells with adjusted standardised residuals  $\geq +2$ = Cluster 1 (Substance use issue – Yes)

<sup>e</sup> Cells with adjusted standardised residuals  $\geq +2$ = Cluster 1 (Personality Disorder – Yes)

## Supplementary Table: Treatment variables by cluster

|                                         | Cluster 1<br>(n=17) | Cluster 2<br>(n=43) | Cluster 3<br>(n=51) | TOTAL<br>(N=111) | Test <sup>b</sup>                | p    |
|-----------------------------------------|---------------------|---------------------|---------------------|------------------|----------------------------------|------|
| <b>Referral and Legal status</b>        |                     |                     |                     |                  |                                  |      |
| Community-based referral                | 52.9%               | 69.8%               | 62.7%               | 64.0%            | $X^2_{(2)}=1.557$                | .459 |
| Involuntary treatment <sup>b</sup>      | 41.2%               | 41.9%               | 41.2%               | 41.4%            | $X^2_{(2)}=.005$                 | .997 |
| Guardianship order present              | -                   | 2.3%                | 7.8%                | 4.5%             | Fisher's Exact Test <sup>c</sup> | .459 |
| <b>Medications prescribed</b>           |                     |                     |                     |                  |                                  |      |
| Anti-psychotic medication:              |                     |                     |                     |                  |                                  |      |
| - CPZ equivalence, mg ( $\bar{X}$ , SD) | 522.2(359.7)        | 391.5(212.1)        | 382.6(322.7)        | 407.41(292.9)    | $K_{(2)}=2.373$                  | .305 |
| - Depot prescribed                      | 52.9%               | 46.5%               | 43.1%               | 45.9%            | $X^2_{(2)}=.502$                 | .778 |
| - Clozapine prescribed                  | 29.4%               | 16.3%               | 27.5%               | 23.4%            | Fisher's Exact Test <sup>c</sup> | .336 |
| - Number of antipsychotics              | 1.41(.618)          | 1.28(.630)          | 1.31(.678)          | 1.32(.676)       | $K_{(2)}=.756$                   | .685 |
| Mood stabiliser:                        |                     |                     |                     |                  |                                  |      |
| - Lithium                               | 23.5%               | 16.3%               | 5.9%                | 14.4%            | Fisher's Exact Test <sup>c</sup> | .506 |
| - Sodium valproate                      | 11.8%               | 16.3%               | 5.9%                | 10.8%            | Fisher's Exact Test <sup>c</sup> | .291 |
| - Other                                 | -                   | 2.3%                | 7.8%                | 4.5%             | Fisher's Exact Test <sup>c</sup> | .459 |
| Other medication:                       |                     |                     |                     |                  |                                  |      |
| - Antidepressant                        | 29.4%               | 51.2%               | 37.3%               | 41.4%            | $X^2_{(2)}=3.057$                | .217 |
| - Benzodiazepine(s)                     | 17.6%               | 16.3%               | 5.9%                | 11.7%            | Fisher's Exact Test <sup>c</sup> | .174 |

<sup>a</sup> Community-based referral compared to combined acute and sub-acute inpatient referral source

<sup>b</sup> Involuntary treatment includes both Involuntary Treatment Orders and Forensic Order

<sup>c</sup> Unadjusted odds ratio: Guardianship order present =1.758, Clozapine prescribed=2.139; Lithium prescribed=1.545; Sodium valproate prescribed=2.718; Other mood stabiliser prescribed=1.758; Benzodiazepine(s)=3.419

### Supplementary Table: Clinical assessment battery – mean score and (standard deviation) by cluster

|                                   | Cluster 1<br>(n=17) |        | Cluster 2<br>(n=43) |        | Cluster 3<br>(n=51) |        | Total<br>(N=111) |        | Test                     | p                       |
|-----------------------------------|---------------------|--------|---------------------|--------|---------------------|--------|------------------|--------|--------------------------|-------------------------|
|                                   | $\bar{x}$           | (SD)   | $\bar{x}$           | (SD)   | $\bar{x}$           | (SD)   | $\bar{x}$        | (SD)   |                          |                         |
| <b>Functioning and disability</b> |                     |        |                     |        |                     |        |                  |        |                          |                         |
| HoNOS (Total)                     | 9.00                | 5.534  | 13.98               | 5.755  | 6.94                | 3.906  | 9.98             | 5.891  | $K_{(2)}=35.674$         | <b>.000<sup>a</sup></b> |
| - Behaviour                       | 1.88                | 1.409  | 1.21                | 1.567  | .51                 | 1.255  | .99              | 1.480  | $K_{(2)}=21.306$         | <b>.000<sup>b</sup></b> |
| - Impairment                      | 1.41                | 1.734  | 2.40                | 1.482  | 1.10                | 1.237  | 1.65             | 1.529  | $K_{(2)}=18.997$         | <b>.000<sup>c</sup></b> |
| - Symptoms                        | 3.65                | 2.548  | 4.84                | 2.468  | 2.41                | 1.878  | 3.54             | 2.475  | $K_{(2)}=21.968$         | <b>.000<sup>d</sup></b> |
| - Social                          | 2.06                | 2.384  | 5.53                | 3.150  | 2.92                | 2.162  | 3.80             | 2.957  | $K_{(2)}=24.865$         | <b>.000<sup>e</sup></b> |
| LSP-16 (Total)                    | 8.65                | 5.219  | 16.74               | 5.416  | 9.33                | 4.339  | 12.21            | 5.945  | $K_{(2)}=40.508$         | <b>.000<sup>e</sup></b> |
| - Withdrawal                      | 1.53                | 1.218  | 4.37                | 1.865  | 2.18                | 1.352  | 2.92             | 1.882  | $K_{(2)}=41.562$         | <b>.000<sup>e</sup></b> |
| - Self-care                       | 3.59                | 2.717  | 5.81                | 2.119  | 3.31                | 1.715  | 4.40             | 2.389  | $K_{(2)}=30.522$         | <b>.000<sup>f</sup></b> |
| - Compliance                      | 1.47                | 1.625  | 2.49                | 1.549  | 1.65                | 1.494  | 2.06             | 1.603  | $K_{(2)}=8.697$          | <b>.013<sup>g</sup></b> |
| - Anti-social                     | 1.18                | 1.237  | 1.84                | 1.717  | 1.18                | 1.545  | 1.45             | 1.610  | $K_{(2)}=4.711$          | .095                    |
| Allen Cognitive Level             | 4.95                | .445   | 5.00                | .389   | 5.13                | .407   | 5.054            | .409   | $K_{(2)}=3.714$          | .156                    |
| Social Functioning Scale          | 104.57              | 8.183  | 98.02               | 7.138  | 107.82              | 6.95   | 103.53           | 8.469  | $K_{(2)}=34.695$         | <b>.000<sup>h</sup></b> |
| <b>Symptomatic measures</b>       |                     |        |                     |        |                     |        |                  |        |                          |                         |
| BPRS-18 (Total)                   | 39.24               | 8.066  | 44.33               | 8.225  | 32.41               | 6.885  | 38.07            | 9.338  | $K_{(2)}=38.473$         | <b>.000<sup>i</sup></b> |
| - Resistance                      | 5.76                | 1.954  | 6.67                | 2.476  | 5.04                | 1.536  | 5.78             | 2.129  | $K_{(2)}=13.685$         | <b>.001<sup>j</sup></b> |
| - Positive symptoms               | 11.29               | 4.089  | 12.12               | 5.399  | 9.08                | 3.893  | 10.59            | 4.743  | $K_{(2)}=9.232$          | <b>.010<sup>k</sup></b> |
| - Negative symptoms               | 6.24                | 2.728  | 8.63                | 3.599  | 5.22                | 2.648  | 6.69             | 3.424  | $K_{(2)}=22.763$         | <b>.000<sup>l</sup></b> |
| - Psychological discomfort        | 14.94               | 4.220  | 15.30               | 5.040  | 11.98               | 4.474  | 13.72            | 4.899  | $F_{(2,108)}=6.59$<br>5  | <b>.002<sup>m</sup></b> |
| SANS (Total)                      | 45.82               | 11.706 | 58.63               | 14.635 | 39.41               | 16.755 | 47.84            | 17.561 | $F_{(2,108)}=18.6$<br>16 | <b>.000<sup>n</sup></b> |
| - Affective flattening            | 14.18               | 7.427  | 18.67               | 7.177  | 11.63               | 7.997  | 14.75            | 8.207  | $K_{(2)}=16.675$         | <b>.000<sup>l</sup></b> |
| - Alogia                          | 3.65                | 3.040  | 6.53                | 4.677  | 3.24                | 3.479  | 4.58             | 4.203  | $K_{(2)}=14.393$         | <b>.001<sup>j</sup></b> |
| - Avolition/apathy                | 9.76                | 2.818  | 11.88               | 2.312  | 8.47                | 3.797  | 9.99             | 3.497  | $K_{(2)}=25.374$         | <b>.000<sup>o</sup></b> |



|                        |       |       |       |       |       |       |       |       |                  |                         |
|------------------------|-------|-------|-------|-------|-------|-------|-------|-------|------------------|-------------------------|
| - Anhedonia/asociality | 13.88 | 3.295 | 16.79 | 3.433 | 12.61 | 4.618 | 14.42 | 4.420 | $K_{(2)}=21.703$ | <b>.000<sup>p</sup></b> |
| - Attention            | 4.35  | 3.081 | 4.74  | 3.430 | 3.47  | 2.976 | 4.10  | 3.202 | $K_{(2)}=3.383$  | <b>.184</b>             |

**Substance use (alcohol)**

|       |       |       |      |       |      |      |      |       |                  |                         |
|-------|-------|-------|------|-------|------|------|------|-------|------------------|-------------------------|
| AUDIT | 23.53 | 6.983 | 5.67 | 6.171 | 3.88 | 4.48 | 7.59 | 8.823 | $K_{(2)}=42.393$ | <b>.000<sup>a</sup></b> |
|-------|-------|-------|------|-------|------|------|------|-------|------------------|-------------------------|

- a Post-hoc tests with Bonferroni correction for multiple tests identified statistically significant pairwise comparison between Cluster 2 and 1&3 ( $p=.013$  and  $p.000$  respectively)
- b Post-hoc tests with Bonferroni correction for multiple tests identified statistically significant pairwise comparison between Cluster 3 and 1&2 ( $p=.008$  and  $p.000$  respectively)
- c Post-hoc tests with Bonferroni correction for multiple tests identified statistically significant pairwise comparison between Cluster 2 and 1&3 ( $p=.024$  and  $p.000$  respectively)
- d Post-hoc tests with Bonferroni correction for multiple tests identified statistically significant pairwise comparison between Cluster 2 and 3 only ( $p=.000$ )
- e Post-hoc tests with Bonferroni correction for multiple tests identified statistically significant pairwise comparison between Cluster 2 and 1&3 ( $p=.000$  and  $p.000$  respectively)
- f Post-hoc tests with Bonferroni correction for multiple tests identified statistically significant pairwise comparison between Cluster 2 and 1&3 ( $p=.001$  and  $p.000$  respectively)
- g Post-hoc tests with Bonferroni correction for multiple tests identified statistically significant pairwise comparison between Cluster 2 and 3 only ( $p=.029$ )
- h Post-hoc tests with Bonferroni correction for multiple tests identified statistically significant pairwise comparison between Cluster 2 and 1&3 ( $p=.016$  and  $p.000$  respectively)
- i Post-hoc tests with Bonferroni correction for multiple tests identified statistically significant pairwise comparison between Cluster 3 and 1&2 ( $p=.016$  and  $p.000$  respectively)
- j Post-hoc tests with Bonferroni correction for multiple tests identified statistically significant pairwise comparison between Cluster 2 and 3 only ( $p=.001$ )
- k Post-hoc tests with Bonferroni correction for multiple tests identified statistically significant pairwise comparison between Cluster 2 and 3 only ( $p=.013$ )
- l Post-hoc tests with Bonferroni correction for multiple tests identified statistically significant pairwise comparison between Cluster 2 and 3 only ( $p=.000$ )
- m Post-hoc tests with Bonferroni correction for multiple tests identified statistically significant pairwise comparison between Cluster 2 and 3 only ( $p=.003$ )
- n Post-hoc tests with Bonferroni correction for multiple tests identified statistically significant pairwise comparison between Cluster 1 and 2 ( $p=.013$ ), and Cluster 2 and 3 ( $p=.000$ )
- o Post-hoc tests with Bonferroni correction for multiple tests identified statistically significant pairwise comparison between Cluster 2 and 1&3 ( $p=.025$  and  $p.000$  respectively)
- p Post-hoc tests with Bonferroni correction for multiple tests identified statistically significant pairwise comparison between Cluster 2 and 1&3 ( $p=.034$  and  $p.000$  respectively)

q Post-hoc tests with Bonferroni correction for multiple tests identified statistically significant pairwise comparison between Cluster 1 and 2&3 ( $p=.000$  and  $p.000$  respectively)

## Supplementary Table: Consumer-rated measures by Cluster

|                                        | Cluster 1 |               | Cluster 2 |               | Cluster 3 |               | N <sup>a</sup> | $\bar{X}(SD)$ | Test                        | p                       |
|----------------------------------------|-----------|---------------|-----------|---------------|-----------|---------------|----------------|---------------|-----------------------------|-------------------------|
|                                        | n         | $\bar{X}(SD)$ | n         | $\bar{X}(SD)$ | n         | $\bar{X}(SD)$ |                |               |                             |                         |
| <b>Mental Health Inventory (Total)</b> | 17        | 49.88(22.209) | 43        | 51.84(19.848) | 51        | 63.00(17.034) | 111            | 56.67(19.720) | $K_{(2)}=10.445$            | <b>.005<sup>a</sup></b> |
| Psychological wellbeing                |           | 38.53(23.492) |           | 40.00(22.018) |           | 53.31(21.575) |                | 45.89(22.901) | $K_{(2)}=11.118$            | <b>.004<sup>b</sup></b> |
| Psychological distress                 |           | 43.41(24.308) |           | 39.26(22.065) |           | 27.12(22.230) |                | 34.32(23.298) | $K_{(2)}=7.836$             | <b>.020<sup>c</sup></b> |
| <b>STORI-30</b>                        | 16        | -             | 42        | -             | 47        | -             | 105            | -             | Fisher's exact <sup>b</sup> | <b>.015<sup>d</sup></b> |
| Moratorium                             | 3         | 18.8%         | 9         | 21.4%         | 2         | 4.3%          | 14             | 13.3%         |                             |                         |
| Awareness                              | 7         | 43.8%         | 15        | 35.7%         | 10        | 21.3%         | 32             | 30.5%         |                             |                         |
| Preparation                            | 1         | 6.3%          | 2         | 4.8%          | 6         | 12.8%         | 9              | 8.6%          |                             |                         |
| Rebuilding                             | 2         | 12.5%         | 9         | 21.4%         | 7         | 14.9%         | 18             | 17.1%         |                             |                         |
| Growth                                 | 3         | 18.8%         | 7         | 16.7%         | 22        | 46.8%         | 32             | 30.5%         |                             |                         |

<sup>a</sup> Post-hoc tests with Bonferroni correction for multiple tests identified statistically significant pairwise comparison between Cluster 3 and 1&2 ( $p=.030$  and  $p.021$  respectively)

<sup>b</sup> Post-hoc tests with Bonferroni correction for multiple tests identified statistically significant pairwise comparison between Cluster 3 and 1&2 ( $p=.042$  and  $p.010$  respectively)

<sup>c</sup> Post-hoc tests with Bonferroni correction for multiple tests identified no statistically significant pairwise comparisons

<sup>d</sup> Unadjusted odds ratio: STORI-30 = 17.810; cells with adjusted standardised residuals  $\geq +2$  = Cluster 2 (Moratorium) and Cluster 3 (Growth), cells with adjusted standardised residuals  $\leq -2$  = Cluster 2 (Growth) and Cluster 3 (Moratorium).

**Supplementary Information: Cluster solution (Figure 1)**

| <b>Z-scores for clinical assessment battery items</b>                                 |    |    |    |       |       |       |       |       |            |      |      |       |  |
|---------------------------------------------------------------------------------------|----|----|----|-------|-------|-------|-------|-------|------------|------|------|-------|--|
|                                                                                       | N  |    |    |       | Mean  |       |       |       | Std. Error |      |      |       |  |
|                                                                                       | 1  | 2  | 3  | Total | 1     | 2     | 3     | Total | 1          | 2    | 3    | Total |  |
| Zscore: LSP_TOTAL_recode                                                              | 17 | 43 | 51 | 111   | -0.60 | 0.76  | -0.48 | -0.02 | 0.21       | 0.14 | 0.10 | 0.10  |  |
| Zscore: HoNOS Total score (re-coded)                                                  | 17 | 43 | 51 | 111   | -0.22 | 0.61  | -0.56 | -0.06 | 0.22       | 0.15 | 0.09 | 0.09  |  |
| Zscore: BPRS Total score                                                              | 17 | 43 | 51 | 111   | 0.06  | 0.59  | -0.64 | -0.06 | 0.20       | 0.13 | 0.10 | 0.09  |  |
| Zscore: SANS Total                                                                    | 17 | 43 | 51 | 111   | -0.10 | 0.61  | -0.45 | 0.02  | 0.16       | 0.12 | 0.13 | 0.09  |  |
| Zscore: AUDIT Total score                                                             | 17 | 43 | 51 | 111   | 1.82  | -0.20 | -0.40 | 0.01  | 0.19       | 0.11 | 0.07 | 0.09  |  |
| Zscore: SFS - Average Scaled                                                          | 17 | 43 | 51 | 111   | 0.09  | -0.71 | 0.48  | -0.04 | 0.24       | 0.13 | 0.12 | 0.10  |  |
| Zscore: Allen's Cognitive Level                                                       | 17 | 43 | 51 | 111   | -0.29 | -0.19 | 0.17  | -0.04 | 0.27       | 0.15 | 0.14 | 0.10  |  |
| <b>Conversion so that positive scores equate to less impairment for all variables</b> |    |    |    |       |       |       |       |       |            |      |      |       |  |
|                                                                                       | N  |    |    |       | Mean  |       |       |       | Std. Error |      |      |       |  |
|                                                                                       | 1  | 2  | 3  | Total | 1     | 2     | 3     | Total | 1          | 2    | 3    | Total |  |
| Zscore: LSP_TOTAL_recode                                                              | 17 | 43 | 51 | 111   | 0.60  | -0.76 | 0.48  | 0.02  | 0.21       | 0.14 | 0.10 | 0.10  |  |
| Zscore: HoNOS Total score (re-coded)                                                  | 17 | 43 | 51 | 111   | 0.22  | -0.61 | 0.56  | 0.06  | 0.22       | 0.15 | 0.09 | 0.09  |  |
| Zscore: BPRS Total score                                                              | 17 | 43 | 51 | 111   | -0.06 | -0.59 | 0.64  | 0.06  | 0.20       | 0.13 | 0.10 | 0.09  |  |
| Zscore: SANS Total                                                                    | 17 | 43 | 51 | 111   | 0.10  | -0.61 | 0.45  | -0.02 | 0.16       | 0.12 | 0.13 | 0.09  |  |
| Zscore: AUDIT Total score                                                             | 17 | 43 | 51 | 111   | -1.82 | 0.20  | 0.40  | -0.01 | 0.19       | 0.11 | 0.07 | 0.09  |  |
| Zscore: SFS - Average Scaled                                                          | 17 | 43 | 51 | 111   | 0.09  | -0.71 | 0.48  | -0.04 | 0.24       | 0.13 | 0.12 | 0.10  |  |
| Zscore: Allen's Cognitive Level                                                       | 17 | 43 | 51 | 111   | -0.29 | -0.19 | 0.17  | -0.04 | 0.27       | 0.15 | 0.14 | 0.10  |  |

### Structure Matrix

|                                      | Function |        |
|--------------------------------------|----------|--------|
|                                      | 1        | 2      |
| Zscore: LSP_TOTAL_recode             | .489*    | 0.025  |
| Zscore: HoNOS Total score (re-coded) | .405*    | 0.164  |
| Zscore: BPRS Total score             | .401*    | 0.293  |
| Zscore: SFS - Average Scaled         | -.381*   | -0.170 |
| Zscore: SANS Total                   | .353*    | 0.158  |
| Zscore: AUDIT Total score            | -0.257   | .911*  |
| Zscore: Allen's Cognitive Level      | -0.064   | -.130* |

Pooled within-groups correlations between discriminating variables and

\*. Largest absolute correlation between each variable and any discriminant

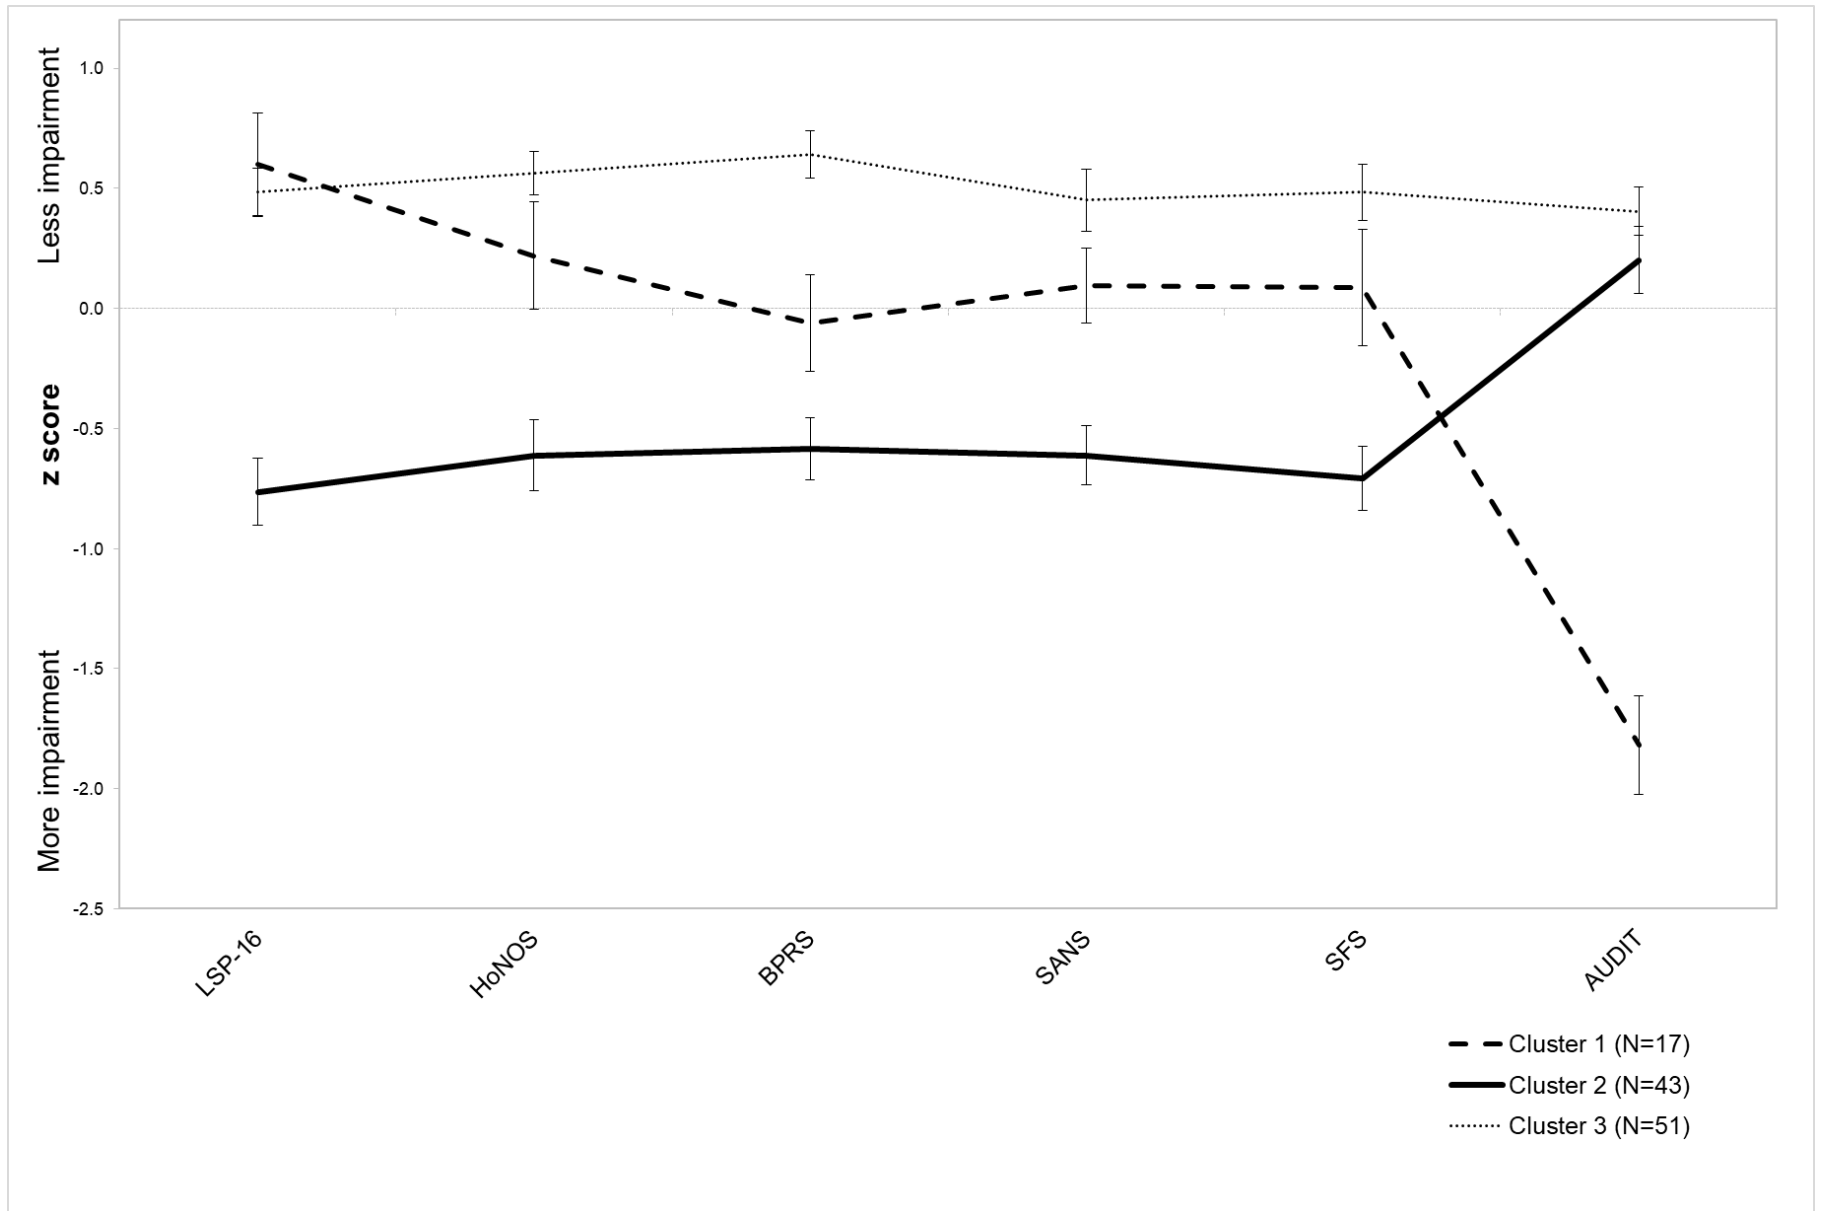

Supplement: DataSheet_1.pdf [file DataSheet_1.pdf]
